# Supplementary material for: Evaluation of Influencing Factors on Metabolism of Land-Based n-3 Poly Unsaturated Fatty Acids—The KoALA Study
Source: MDPI journal article supplement (doi:10.3390/nu15204461), 2023-10-20
Supplement: s1 [file s1]

## Supplementary data

**Table S1.** Biochemical methods.

| Parameter                              | Instrument                                                                          | Reference range                              |
|----------------------------------------|-------------------------------------------------------------------------------------|----------------------------------------------|
| Plasma, serum                          |                                                                                     |                                              |
| Total cholesterol (mmol/l) *           | Abbott Architect CI 16200 analyzer<br>(Abbott, Wiesbaden, Germany)                  | <5.2                                         |
| LDL cholesterol (mmol/l) *             | Abbott Architect CI 16200 analyzer<br>(Abbott, Wiesbaden, Germany)                  | <3.35                                        |
| HDL cholesterol (mmol/l) *             | Abbott Architect CI 16200 analyzer<br>(Abbott, Wiesbaden, Germany)                  | >1.03                                        |
| Triglycerides (mmol/l) *               | Abbott Architect CI 16200 analyzer<br>(Abbott, Wiesbaden, Germany)                  | <1.7                                         |
| Apolipoprotein A (g/l) <sup>◊</sup>    | COBAS INTEGRA 400 plus System<br>(Roche Diagnostics Ltd., Rotkreuz,<br>Switzerland) | women: 1.08 – 2.25<br>men: 1.04 – 2.02       |
| Apolipoprotein B (g/l) <sup>◊</sup>    | COBAS INTEGRA 400 plus System<br>(Roche Diagnostics Ltd., Rotkreuz,<br>Switzerland) | women: 0.60 – 1.17<br>men: 0.66 – 1.33       |
| High-sensitivity CRP (mg/d) *          | Abbott Architect CI 16200 analyzer<br>(Abbott, Wiesbaden, Germany)                  | ≤0.3                                         |
| Homocysteine (μmol/l) *                | HPLC (Shimadzu, Kyoto, Japan)                                                       | 5 – 15                                       |
| Vitamin E (μmol/l) *                   | HPLC (Shimadzu, Kyoto, Japan)                                                       | 11.6 – 46.4                                  |
| Glucose (mmol/l) *                     | Abbott Architect CI 16200 analyzer<br>(Abbott, Wiesbaden, Germany)                  | 18 – 60 y: 4.1 – 5.9<br>60 – 90 y: 4.6 – 6.4 |
| Insulin (mU/l) *                       | Abbott Architect CI 16200 analyzer<br>(Abbott, Wiesbaden, Germany)                  | 3 – 25                                       |
| HbA1c (%) *                            | Tosoh HLC-723G11<br>(Sysmex, Norderstedt, Germany)                                  | 4.5 – 6.1                                    |
| Lipoprotein(a) (nmol/l) *              | Abbott Architect CI 16200 analyzer<br>(Abbott, Wiesbaden, Germany)                  | <72                                          |
| MDA-LDL cholesterol (U/l) <sup>◊</sup> | Manual MDA-LDL ELISA,<br>ImmBioMed, 2019                                            | No information available                     |
| Calcium (mmol/l) *                     | Abbott Architect CI 16200 analyzer<br>(Abbott, Wiesbaden, Germany)                  | 2.15 – 2.50                                  |
| Potassium (mmol/l) *                   | Abbott Architect CI 16200 analyzer<br>(Abbott, Wiesbaden, Germany)                  | 3.4 – 4.5                                    |
| Ferritin (μg/l) *                      | Abbott Architect CI 16200 analyzer<br>(Abbott, Wiesbaden, Germany)                  | women: 13 – 150<br>men: 30 – 400             |
| Transferrin (g/l) *                    | Abbott Architect CI 16200 analyzer<br>(Abbott, Wiesbaden, Germany)                  | 2.0 – 3.6                                    |
| Folic acid (ng/ml) *                   | Abbott Architect CI 16200 analyzer<br>(Abbott, Wiesbaden, Germany)                  | 3.9 – 26.8 <sup>[78]</sup>                   |
| Biotin (ng/l) <sup>◊</sup>             | ELISA                                                                               | > 250                                        |

**Table S1.** Continued.

| Parameter                          | Instrument                                                         | Reference range          |
|------------------------------------|--------------------------------------------------------------------|--------------------------|
| Plasma, serum                      |                                                                    |                          |
| Holo-transcobalamin (pmol/l) *     | Abbott Architect CI 16200 analyzer<br>(Abbott, Wiesbaden, Germany) | > 37.52                  |
| Vitamin A (μmol/l) *               | HPLC (Shimadzu, Kyoto, Japan)                                      | 1.46 – 2.84 [78]         |
| Vitamin B <sub>2</sub> (μg/l) *    | HPLC (Shimadzu, Kyoto, Japan)                                      | 180 – 295                |
| Vitamin B <sub>6</sub> (nmol/l) *  | HPLC (Shimadzu, Kyoto, Japan)                                      | 14.6 – 72.8              |
| Vitamin B <sub>12</sub> (pmol/l) * | Abbott Architect CI 16200 analyzer<br>(Abbott, Wiesbaden, Germany) | 197 – 7712               |
| Vitamin C (mg/l) *                 | HPLC (Shimadzu, Kyoto, Japan)                                      | 4 – 15                   |
| Vitamin D (nmol/l) *               | Abbott Architect CI 16200 analyzer<br>(Abbott, Wiesbaden, Germany) | > 75                     |
| Vitamin E (μmol/l) *               | HPLC (Shimadzu, Kyoto, Japan)                                      | 11.6 – 46.4              |
| Erythrocytes                       |                                                                    |                          |
| Fatty acids (% FAME) §             | GC-17V3<br>(Shimadzu, Duisburg, Germany)                           | No information available |

\* Measured by Institute of Clinical Chemistry and Laboratory Diagnostics, University Hospital Jena, Jena, Germany; ◇ measured by Dianovis GmbH, Greiz, Germany; § measured by Institute of Nutritional Sciences, Friedrich Schiller University, Jena, Germany. Abbreviations: CRP, c-reactive protein; FAME, fatty acid methyl ester; HDL, high-density lipoprotein; HbA1c, glycated hemoglobin A1c; LDL, low-density lipoprotein; MDA-LDL, malondialdehyd-modified-low-density lipoprotein

**Table S2.** Energy and nutrient intake of the study participants in the week before the start of the intervention period (self-reports, 7 days).

|                                  | High linoleic acid<br>(n = 25) |   | Low linoleic acid<br>(n = 25) |   | High milk<br>(n = 21) |   | Control<br>(n = 26) |   |
|----------------------------------|--------------------------------|---|-------------------------------|---|-----------------------|---|---------------------|---|
| Energy and nutrients             | Characteristics *              | ϕ | Characteristics *             | ϕ | Characteristics *     | ϕ | Characteristics *   | ϕ |
| Energy (kcal/day)                | 2065 (1846, 2600)              | a | 2219 (1724, 2535)             | a | 2098 (1846, 2624)     | a | 2204 (1888, 2532)   | a |
| Carbohydrate (g/day)             | 224 (192, 294)                 | a | 213 (182, 247)                | a | 220 (189, 273)        | a | 238 (175, 273)      | a |
| Fiber (g/day)                    | 23.9 (19.5, 27.1)              | a | 28.4 (20.7, 34.1)             | a | 24.7 (19.9, 40.1)     | a | 27.0 (20.0, 32.9)   | a |
| Total sugar (g/day)              | 108 (87, 155)                  | a | 93 (77, 133)                  | a | 108 (83, 137)         | a | 109 (83, 146)       | a |
| Sucrose (g/day)                  | 50.7 (39.0, 73.6)              | a | 43.5 (31.5, 57.2)             | a | 52.6 (37.2, 62.0)     | a | 52.8 (43.9, 62.8)   | a |
| Glucose (g/day)                  | 19.4 (14.3, 25.6)              | a | 18.8 (14.2, 23.6)             | a | 22.3 (14.4, 24.9)     | a | 18.1 (15.1, 26.8)   | a |
| Fructose (g/day)                 | 24.0 (18.4, 32.3)              | a | 23.4 (19.6, 29.2)             | a | 26.1 (18.7, 35.0)     | a | 24.0 (20.1, 32.2)   | a |
| Alcohol (g/day)                  | 7.4 (2.4, 14.0)                | a | 7.4 (3.8, 15.2)               | a | 6.0 (0.2, 15.1)       | a | 4.1 (2.2, 9.9)      | a |
| Protein (g/day)                  | 82 (67, 109)                   | a | 87 (69, 106)                  | a | 87 (78, 102)          | a | 91 (81, 104)        | a |
| Fat (g/day)                      | 83 (63, 100)                   | a | 87 (73, 118)                  | a | 88 (70, 101)          | a | 92 (74, 106)        | a |
| SFA (g/day)                      | 32.2 (28.9, 42.3)              | a | 37.6 (30.7, 44.6)             | a | 33.9 (28.6, 41.8)     | a | 36.1 (29.6, 41.3)   | a |
| MUFA (g/day)                     | 28.5 (22.2, 36.8)              | a | 31.5 (25.7, 45.6)             | a | 32.3 (25.2, 40.2)     | a | 32.5 (27.3, 38.3)   | a |
| PUFA (g/day)                     | 11.4 (9.3, 16.6)               | a | 12.8 (9.2, 16.4)              | a | 12.4 (9.9, 22.2)      | a | 12.5 (10.2, 16.8)   | a |
| C-18:2 <sub>n6</sub> (g/day)     | 8.8 (7.6, 13)                  | a | 10.4 (7.4, 14.5)              | a | 10.0 (7.7, 15.4)      | a | 10.2 (7.6, 12.8)    | a |
| C-18:3 <sub>n3</sub> (g/day)     | 1.2 (1.0, 1.6)                 | a | 1.4 (1.1, 1.5)                | a | 1.3 (0.9, 1.6)        | a | 1.3 (1.1, 1.8)      | a |
| C-20:5 <sub>n3</sub> (g/day)     | 0.2 (0.0, 0.5)                 | a | 0.2 (0.1, 0.3)                | a | 0.2 (0.1, 0.4)        | a | 0.3 (0.1, 0.5)      | a |
| C-22:6 <sub>n3</sub> (g/day)     | 0.2 (0.1, 0.3)                 | a | 0.2 (0.1, 0.4)                | a | 0.3 (0.1, 0.5)        | a | 0.4 (0.2, 0.5)      | a |
| C-20:4 <sub>n6</sub> (g/day)     | 0.2 (0.1, 0.3)                 | a | 0.2 (0.1, 0.3)                | a | 0.2 (0.1, 0.3)        | a | 0.2 (0.1, 0.3)      | a |
| Vitamin A (mg/day)               | 0.5 (0.4, 1.0)                 | a | 0.6 (0.4, 1.2)                | a | 0.4 (0.3, 0.5)        | a | 0.5 (0.4, 0.7)      | a |
| Vitamin B <sub>1</sub> (mg/day)  | 1.5 (1.2, 2.0)                 | a | 1.6 (1.3, 2.2)                | a | 1.9 (1.2, 2.1)        | a | 1.5 (1.3, 1.9)      | a |
| Vitamin B <sub>2</sub> (mg/day)  | 1.6 (1.3, 1.8)                 | a | 1.6 (1.2, 1.9)                | a | 1.5 (1.4, 1.8)        | a | 1.7 (1.4, 2.0)      | a |
| Vitamin B <sub>6</sub> (mg/day)  | 1.9 (1.5, 2.5)                 | a | 2.0 (1.7, 2.2)                | a | 2.1 (1.8, 2.4)        | a | 2.0 (1.7, 2.5)      | a |
| Vitamin B <sub>12</sub> (μg/day) | 5.6 (4.8, 7.9)                 | a | 5.4 (4.4, 6.6)                | a | 5.2 (4.1, 6.5)        | a | 5.7 (4.4, 7.4)      | a |
| Vitamin C (mg/day)               | 124 (94, 145)                  | a | 122 (88, 176)                 | a | 139 (108, 161)        | a | 130 (92, 149)       | a |
| Vitamin D (μg/day)               | 3.7 (2.2, 6.9)                 | a | 2.0 (1.2, 4.4)                | a | 3.2 (2.3, 4.4)        | a | 3.9 (2.0, 6.7)      | a |
| Vitamin E (mg/day)               | 9.1 (7.8, 13.7)                | a | 10.7 (9.0, 15.8)              | a | 10.5 (9.2, 17.2)      | a | 11.9 (9.4, 14.4)    | a |
| Vitamin K (mg/day)               | 0.1 (0.1, 0.2)                 | a | 0.2 (0.1, 0.2)                | a | 0.1 (0.1, 0.2)        | a | 0.2 (0.1, 0.2)      | a |
| Calcium (mg/day)                 | 832 (654, 932)                 | a | 788 (645, 980)                | a | 811 (647, 1002)       | a | 844 (671, 1145)     | a |
| Magnesium (mg/day)               | 346 (290, 437)                 | a | 391 (320, 457)                | a | 353 (292, 478)        | a | 382 (332, 458)      | a |
| Potassium (mg/day)               | 3389 (2800, 4096)              | a | 3601 (2858, 4036)             | a | 3512 (3011, 4243)     | a | 3605 (3325, 4431)   | a |
| Iron (mg/day)                    | 12.7 (10.0, 15.8)              | a | 12.4 (10.7, 14.5)             | a | 12.0 (9.5, 15.3)      | a | 12.8 (11.1, 14.7)   | a |
| Zinc (mg/day)                    | 10.4 (8.4, 13.9)               | a | 11.4 (8.9, 13.8)              | a | 11.2 (9.5, 15.1)      | a | 11.7 (11.3, 14.9)   | a |
| Sodium (mg/day)                  | 2310 (1820, 3195)              | a | 2180 (1810, 2700)             | a | 2131 (1741, 2704)     | a | 2061 (1694, 2801)   | a |
| Chloride (mg/day)                | 4073 (2930, 4675)              | a | 3620 (2815, 4069)             | a | 3578 (2943, 4335)     | a | 3444 (2826, 4860)   | a |
| Phosphor (mg/day)                | 1410 (1080, 1623)              | a | 1424 (1075, 1652)             | a | 1354 (1120, 1750)     | a | 1528 (1252, 1794)   | a |
| Iodine (μg/day)                  | 91 (76, 137)                   | a | 106 (72, 130)                 | a | 99 (73, 116)          | a | 106 (71, 134)       | a |
| Copper (mg/day)                  | 1.8 (1.6, 2.3)                 | a | 2.0 (1.6, 2.3)                | a | 1.7 (1.5, 2.6)        | a | 2.0 (1.7, 2.5)      | a |
| Manganese (mg/day)               | 4.5 (3.6, 5.8)                 | a | 4.7 (3.8, 6.0)                | a | 4.1 (3.3, 7.6)        | a | 4.9 (3.9, 7.2)      | a |

\* Variables expressed as mean (±SD) and/or as median (25<sup>th</sup>, 75<sup>th</sup> percentile) depending on the statistical test that was performed; ϕ groups without a common letter are significantly different,  $p < 0.05$ . Abbreviations: MUFA, monounsaturated fatty acids; PUFA, polyunsaturated fatty acids; SFA, saturated fatty acids

**Table S3.** Comparison of erythrocyte fatty acids at baseline (week 0), after weeks 4 and 8 and at the end of the intervention period (week 12).

| Erythrocyte fatty acids<br>(% FAME) | Week    | High linoleic acid<br>( <i>n</i> = 27) |     |     | Low linoleic acid<br>( <i>n</i> = 27) |     |     | High milk<br>( <i>n</i> = 22)         |   |     | Control<br>( <i>n</i> = 27)           |     |     |
|-------------------------------------|---------|----------------------------------------|-----|-----|---------------------------------------|-----|-----|---------------------------------------|---|-----|---------------------------------------|-----|-----|
|                                     |         | Characteristics *                      | Δ   | ◇   | Characteristics *                     | Δ   | ◇   | Characteristics *                     | Δ | ◇   | Characteristics *                     | Δ   | ◇   |
| C-14:0                              | 0       | 0.16 (±0.07)                           | a   | a   | 0.17 (±0.06)                          | a   | a,b | 0.20 (±0.06)                          | a | b   | 0.25 (±0.07)<br>0.25 (0.19, 0.30)     | a   | c   |
|                                     | 4       | 0.19 (±0.05)                           | a   | a   | 0.19 (±0.06)                          | a,b | a   | 0.21 (±0.06)                          | a | a   | 0.25 (±0.07)<br>0.25 (0.21, 0.31)     | a   | b   |
|                                     | 8       | 0.20 (±0.04)<br>0.21 (0.18, 0.22)      | a   | a   | 0.20 (±0.05)<br>0.19 (0.17, 0.24)     | b   | a   | 0.24 (±0.09)<br>0.23 (0.19, 0.26)     | a | a   | 0.27 (0.23, 0.33)                     | b   | b   |
|                                     | 12      | 0.20 (±0.03)                           | a   | a   | 0.19 (±0.03)                          | a,b | a   | 0.22 (±0.08)                          | a | a   | 0.29 (±0.07)<br>0.28 (0.25, 0.34)     | b   | b   |
|                                     | Cfb (%) | 33.03 (0.40, 81.76)                    |     | a   | 14.33 (-12.35, 61.48)                 |     | a   | -7.24 (-20.07, 66.48)                 |   | a   | 21.95 (8.61, 28.45)                   |     | a   |
| C-15:0                              | 0       | 0.12 (±0.03)<br>0.11 (0.09, 0.14)      | a   | a   | 0.11 (0.10, 0.13)                     | a   | a   | 0.13 (0.12, 0.19)                     | a | b   | 0.16 (±0.03)<br>0.16 (0.14, 0.18)     | a   | b   |
|                                     | 4       | 0.14 (±0.02)                           | b,c | a   | 0.13 (±0.03)<br>0.13 (0.12, 0.15)     | b,c | a   | 0.15 (±0.03)<br>0.14 (0.12, 0.18)     | a | a   | 0.17 (±0.03)                          | a   | b   |
|                                     | 8       | 0.14 (±0.02)<br>0.14 (0.12, 0.15)      | b   | a,b | 0.14 (0.13, 0.15)                     | b   | a   | 0.16 (0.13, 0.19)                     | a | b,c | 0.18 (±0.04)<br>0.18 (0.16, 0.20)     | b   | c   |
|                                     | 12      | 0.13 (±0.02)                           | a   | a   | 0.12 (±0.02)<br>0.12 (0.11, 0.13)     | a,c | a   | 0.15 (±0.05)<br>0.15 (0.11, 0.17)     | a | b   | 0.19 (±0.04)                          | b   | c   |
|                                     | Cfb (%) | 10.71 (-8.08, 35.74)                   |     | a   | 10.73 (-7.42, 27.21)                  |     | a   | -13.50 (-19.21, 31.98)                |   | a   | 15.82 (8.17, 29.73)                   |     | a   |
| C-16:0                              | 0       | 16.58 (±2.71)                          | a   | a   | 16.78 (±2.70)                         | a   | a   | 21.98 (±2.84)<br>21.23 (20.07, 23.75) | a | b   | 21.13 (±1.74)<br>20.81 (19.92, 21.98) | a   | b   |
|                                     | 4       | 18.65 (±2.24)<br>18.7 (17.55, 20.23)   | b   | a   | 18.96 (±2.28)<br>19.09 (18.05, 20.54) | b   | a   | 21.09 (19.13, 23.56)                  | a | b   | 22.57 (20.60, 22.88)                  | b   | b   |
|                                     | 8       | 20.17 (±0.88)                          | c   | a   | 20.35 (±1.08)                         | c   | a   | 23.10 (±3.96)<br>23.68 (20.86, 24.91) | a | b   | 23.04 (±1.37)<br>23.14 (22.13, 23.80) | b,c | b   |
|                                     | 12      | 20.25 (±1.11)<br>20.02 (19.49, 21.12)  | c   | a   | 20.11 (±0.77)<br>20.12 (19.63, 20.49) | c   | a   | 23.37 (19.37, 25.60)                  | a | b   | 23.66 (22.57, 24.68)                  | c   | c   |
|                                     | Cfb (%) | 23.33 (7.84, 42.58)                    |     | a   | 22.29 (4.36, 38.32)                   |     | a   | -1.45 (-8.83, 22.04)                  |   | b   | 11.93 (8.63, 19.38)                   |     | a,b |

Table S3. Continued

| Erythrocyte fatty acids<br>(% FAME) | Week             | High linoleic acid<br>( <i>n</i> = 27) |                                       |   | Low linoleic acid<br>( <i>n</i> = 27) |                                      |     | High milk<br>( <i>n</i> = 22)         |                                       |     | Control<br>( <i>n</i> = 27)           |                                       |     |     |
|-------------------------------------|------------------|----------------------------------------|---------------------------------------|---|---------------------------------------|--------------------------------------|-----|---------------------------------------|---------------------------------------|-----|---------------------------------------|---------------------------------------|-----|-----|
|                                     |                  | Characteristics *                      | Δ                                     | ◇ | Characteristics *                     | Δ                                    | ◇   | Characteristics *                     | Δ                                     | ◇   | Characteristics *                     | Δ                                     | ◇   |     |
| C-17:0                              | 0                | 0.25 (±0.03)                           | a                                     | a | 0.25 (±0.03)<br>0.25 (0.23, 0.27)     | a                                    | a   | 0.28 (±0.05)<br>0.27 (0.24, 0.31)     | a                                     | b   | 0.29 (±0.03)                          | a                                     | b   |     |
|                                     | 4                | 0.27 (±0.03)<br>0.27 (0.24, 0.29)      | b                                     | a | 0.26 (0.25, 0.28)                     | b,c                                  | a   | 0.28 (0.25, 0.30)                     | a                                     | a,b | 0.30 (±0.03)<br>0.30 (0.27, 0.33)     | a                                     | b   |     |
|                                     | 8                | 0.27 (±0.04)<br>0.27 (0.25, 0.30)      | b                                     | a | 0.27 (0.25, 0.29)                     | b                                    | a   | 0.31 (0.29, 0.34)                     | b                                     | b   | 0.31 (±0.04)<br>0.31 (0.29, 0.33)     | b                                     | b   |     |
|                                     | 12               | 0.25 (±0.03)<br>0.25 (0.24, 0.28)      | a                                     | a | 0.25 (0.24, 0.28)                     | a,c                                  | a   | 0.30 (0.28, 0.33)                     | b                                     | b   | 0.32 (±0.04)<br>0.32 (0.29, 0.35)     | b                                     | b   |     |
|                                     | Cfb (%)          | 1.32 (−3.52, 9.32)                     |                                       | a | 3.78 (−1.11, 8.57)                    |                                      | a   | 8.14 (3.08, 20.65)                    |                                       | a   | 10.49 (1.55, 17.90)                   |                                       | a   |     |
|                                     | C-18:0           | 0                                      | 14.42 (±1.26)                         | a | a                                     | 14.50 (±1.57)                        | a   | a                                     | 12.38 (±1.99)<br>11.95 (11.10, 13.56) | a   | b                                     | 14.08 (±1.85)                         | a   | a   |
|                                     |                  | 4                                      | 12.16 (±1.43)                         | b | a                                     | 12.43 (±1.46)                        | b   | a                                     | 11.42 (±1.24)<br>11.12 (10.61, 12.01) | a   | a                                     | 11.89 (±1.21)                         | b   | a   |
| 8                                   |                  | 11.29 (±0.70)<br>11.34 (10.81, 11.73)  | c                                     | a | 11.44 (±0.79)<br>11.45 (10.93, 11.93) | c                                    | a   | 14.12 (12.66, 14.87)                  | b                                     | b   | 12.45 (±1.40)<br>12.53 (11.56, 13.52) | b                                     | c   |     |
| 12                                  |                  | 11.90 (±1.00)<br>12.28 (11.44, 12.59)  | b                                     | a | 11.70 (±0.94)<br>11.56 (11.08, 12.29) | c                                    | a   | 12.06 (11.16, 12.99)                  | a                                     | a   | 11.71 (±1.36)<br>11.45 (10.69, 12.78) | b                                     | a   |     |
| Cfb (%)                             |                  | −16.56 (−26.00, −10.62)                |                                       | a | −20.62 (−26.92, −14.52)               |                                      | a   | −3.86 (−13.90, 8.69)                  |                                       | b   | −14.13 (−24.25, −6.09)                |                                       | a   |     |
| C-18:1c9                            |                  | 0                                      | 13.95 (±1.03)<br>14.19 (13.24, 14.52) | a | a                                     | 14.08 (±1.18)                        | a   | a                                     | 16.41 (±1.24)<br>16.27 (15.56, 17.49) | a   | b                                     | 15.30 (±1.29)                         | a   | c   |
|                                     |                  | 4                                      | 14.57 (±0.85)<br>14.67 (14.01, 15.20) | b | a                                     | 14.86 (±1.05)                        | b   | a,b                                   | 15.59 (±1.20)                         | b   | b                                     | 15.25 (±1.30)                         | a   | a,b |
|                                     | 8                | 15.13 (±0.73)<br>15.15 (14.61, 15.55)  | b,c                                   | a | 15.62 (±1.02)                         | c                                    | a   | 15.84 (±1.19)<br>15.94 (15.11, 16.87) | a,b                                   | a   | 15.34 (±1.38)                         | a                                     | a   |     |
|                                     | 12               | 14.94 (14.71, 16.03)                   | c                                     | a | 15.90 (±1.05)<br>16.14 (14.87, 16.65) | d                                    | a,b | 16.62 (15.55, 17.18)                  | a                                     | b   | 15.56 (±1.02)<br>15.48 (15, 16.31)    | a                                     | a,b |     |
|                                     | Cfb (%)          | 8.54 (4.74, 16.41)                     |                                       | a | 10.46 (9.03, 16.77)                   |                                      | a   | 0.88 (−5.25, 3.85)                    |                                       | b   | 2.38 (−2.95, 8.35)                    |                                       | b   |     |
|                                     | C-18:2c9c12 (LA) | 0                                      | 10.02 (±1.16)<br>10.09 (9.47, 10.62)  | a | a                                     | 10.31 (±1.05)<br>10.31 (9.63, 10.72) | a   | a                                     | 11.85 (10.97, 12.48)                  | a   | b                                     | 11.02 (10.46, 11.52)                  | a   | b   |
|                                     |                  | 4                                      | 11.76 (±1.36)                         | b | a                                     | 11.19 (±1.22)                        | b   | a                                     | 11.94 (±1.49)<br>11.77 (11.28, 13.04) | a   | a                                     | 11.78 (±1.42)<br>11.73 (11.01, 12.39) | b   | a   |
| 8                                   |                  | 12.83 (±1.42)<br>12.99 (11.92, 13.83)  | c                                     | a | 12.20 (±0.99)<br>12.42 (11.56, 12.89) | c                                    | a,b | 12.10 (11.09, 12.63)                  | a                                     | b   | 11.78 (11.08, 12.46)                  | b                                     | b   |     |
| 12                                  |                  | 12.71 (±1.45)                          | c                                     | a | 12.35 (±0.87)                         | c                                    | a   | 11.97 (±1.69)<br>12.13 (11.55, 12.68) | a                                     | a   | 11.87 (±1.24)<br>11.85 (11.10, 12.42) | b                                     | a   |     |
| Cfb (%)                             |                  | 27.30 (22.09, 33.03)                   |                                       | a | 21.74 (13.50, 28.30)                  |                                      | a   | 5.02 (−0.99, 7.88)                    |                                       | b   | 7.47 (3.22, 12.59)                    |                                       | b   |     |

Table S3. Continued.

| Erythrocyte fatty acids<br>(% FAME)                   | Week    | High linoleic acid<br>( <i>n</i> = 27) |     |     | Low linoleic acid<br>( <i>n</i> = 27) |     |     | High milk<br>( <i>n</i> = 22)     |     |     | Control<br>( <i>n</i> = 27)       |   |     |
|-------------------------------------------------------|---------|----------------------------------------|-----|-----|---------------------------------------|-----|-----|-----------------------------------|-----|-----|-----------------------------------|---|-----|
|                                                       |         | Characteristics *                      | Δ   | ◇   | Characteristics *                     | Δ   | ◇   | Characteristics *                 | Δ   | ◇   | Characteristics *                 | Δ | ◇   |
| aC-18:3c9c12c15 (ALA)<br>( <i>n</i> + (Control) = 26) | 0       | 0.14 (0.12, 0.17)                      | a   | a   | 0.17 (0.14, 0.23)                     | a   | a   | 0.14 (0.12, 0.17)                 | a   | a   | 0.17 (0.13, 0.23)                 | a | a   |
|                                                       | 4       | 0.55 (±0.19)<br>0.56 (0.40, 0.70)      | b   | a   | 0.60 (±0.27)<br>0.54 (0.43, 0.82)     | b   | a   | 0.61 (±0.24)<br>0.61 (0.41, 0.77) | b   | a   | 0.58 (±0.18)<br>0.57 (0.47, 0.71) | b | a   |
|                                                       | 8       | 0.67 (±0.27)<br>0.69 (0.52, 0.74)      | c   | a   | 0.80 (±0.39)<br>0.77 (0.52, 1.06)     | c   | a   | 0.65 (±0.32)<br>0.64 (0.39, 0.81) | b   | a   | 0.64 (±0.22)<br>0.60 (0.48, 0.79) | b | a   |
|                                                       | 12      | 0.79 (±0.31)<br>0.78 (0.59, 1.02)      | d   | a   | 0.81 (±0.39)<br>0.82 (0.55, 1.12)     | c   | a   | 0.69 (±0.28)<br>0.75 (0.50, 0.92) | b   | a   | 0.70 (±0.23)<br>0.72 (0.57, 0.79) | b | a   |
|                                                       | Cfb (%) | 465.08 (±286.92)                       |     | a   | 354.34 (±223.79)                      |     | a   | 378.33 (±250.97)                  |     | a   | 296.30 (±158.53)                  |   | a   |
| C-20:2c11c14                                          | 0       | 0.20 (0.19, 0.25)                      | a   | a   | 0.23 (0.20, 0.25)                     | a   | a   | 0.24 (±0.03)<br>0.23 (0.22, 0.26) | a   | a   | 0.22 (0.18, 0.24)                 | a | a   |
|                                                       | 4       | 0.21 (0.18, 0.21)                      | a   | a,c | 0.19 (0.18, 0.21)                     | b   | a   | 0.23 (±0.03)<br>0.22 (0.21, 0.24) | a   | b   | 0.21 (0.20, 0.23)                 | a | b,c |
|                                                       | 8       | 0.19 (0.18, 0.21)                      | a   | a   | 0.19 (0.18, 0.21)                     | b   | a   | 0.23 (±0.04)<br>0.23 (0.20, 0.25) | a   | b   | 0.21 (0.19, 0.23)                 | a | a,b |
|                                                       | 12      | 0.19 (0.17, 0.21)                      | a   | a   | 0.19 (0.18, 0.21)                     | b   | a   | 0.24 (±0.05)<br>0.23 (0.21, 0.26) | a   | b   | 0.22 (0.19, 0.24)                 | a | b   |
|                                                       | Cfb (%) | -7.58 (-18.78, -1.51)                  |     | a   | -8.94 (-21.81, 1.39)                  |     | a,c | -1.72 (-12.00, 16.26)             |     | b,c | -1.65 (-7.88, 7.10)               |   | b   |
| C-20:3c8c11c14                                        | 0       | 1.44 (1.38, 1.60)                      | a   | a   | 1.54 (1.25, 1.65)                     | a   | a   | 1.41 (1.26, 1.59)                 | a   | a   | 1.39 (1.20, 1.59)                 | a | a   |
|                                                       | 4       | 1.19 (1.07, 1.37)                      | a   | a   | 1.15 (0.99, 1.41)                     | b   | a   | 1.20 (1.11, 1.35)                 | b   | a   | 1.17 (1.02, 1.36)                 | b | a   |
|                                                       | 8       | 1.07 (1.01, 1.26)                      | b   | a   | 1.14 (0.97, 1.30)                     | b   | a   | 1.21 (1.07, 1.38)                 | b   | a   | 1.15 (1.01, 1.32)                 | b | a   |
|                                                       | 12      | 1.10 (1.00, 1.24)                      | b   | a   | 1.10 (0.98, 1.25)                     | b   | a   | 1.32 (1.19, 1.47)                 | a,b | b   | 1.07 (0.99, 1.32)                 | b | a   |
|                                                       | Cfb (%) | -21.86 (-34.38, -15.79)                |     | a   | -15.70 (-33.06, -7.93)                |     | a   | -7.14 (-20.83, 4.24)              |     | b   | -16.65 (-23.01, -13.99)           |   | a,b |
| C-20:4c5c8c11c14 (ARA)                                | 0       | 15.73 (±1.73)<br>15.50 (14.52, 16.72)  | a   | a   | 15.36 (13.96, 16.22)                  | a   | a   | 14.78 (13.82, 15.62)              | a   | a   | 14.30 (13.82, 15.47)              | a | a   |
|                                                       | 4       | 14.25 (±1.53)<br>13.86 (13.25, 15.10)  | b   | a   | 14.10 (13.27, 14.77)                  | b   | a   | 15.00 (13.56, 16.21)              | a   | a   | 13.19 (12.70, 13.69)              | b | b   |
|                                                       | 8       | 13.46 (±1.24)<br>13.64 (12.66, 14.13)  | c   | a,b | 13.11 (12.44, 13.67)                  | c   | a,b | 14.20 (13.06, 15.92)              | a   | a   | 12.92 (12.26, 13.58)              | b | b   |
|                                                       | 12      | 13.39 (±1.17)<br>13.62 (12.41, 14.05)  | c   | a   | 13.35 (12.65, 14.09)                  | b,c | a   | 13.96 (12.64, 15.92)              | a   | a   | 12.40 (11.48, 13.29)              | c | b   |
|                                                       | Cfb (%) | -15.55 (-20.20, -9.14)                 |     | a   | -10.42 (-17.93, -6.52)                |     | a,b | -4.80 (-12.93, 4.97)              |     | b   | -13.52 (-18.61, -7.94)            |   | a   |
| C-20:4n3 (ETA)<br>( <i>n</i> + (Control) = 22)        | 0       | 0.09 (0.07, 0.12)                      | a   | a   | 0.09 (0.07, 0.14)                     | a   | a   | 0.07 (0.05, 0.08)                 | a   | b   | 0.08 (0.06, 0.11)                 | a | a,b |
|                                                       | 4       | 0.12 (0.10, 0.15)                      | a,b | a   | 0.14 (0.09, 0.17)                     | a,b | a   | 0.12 (0.10, 0.18)                 | b   | a   | 0.13 (0.09, 0.16)                 | b | a   |
|                                                       | 8       | 0.12 (0.10, 0.15)                      | b   | a   | 0.14 (0.11, 0.17)                     | b   | a   | 0.13 (0.09, 0.16)                 | b   | a   | 0.13 (0.11, 0.16)                 | b | a   |
|                                                       | 12      | 0.16 (0.11, 0.18)                      | b   | a   | 0.15 (0.13, 0.19)                     | b   | a   | 0.16 (0.10, 0.20)                 | b   | a   | 0.14 (0.12, 0.18)                 | b | a   |
|                                                       | Cfb (%) | 72.75 (14.74, 157.73)                  |     | a,b | 53.87 (18.57, 146.26)                 |     | a   | 140.21 (93.21, 210.24)            |     | b   | 83.58 (53.3, 119.51)              |   | a,b |

Table S3. Continued.

| Erythrocyte fatty acids<br>(% FAME) | Week         | High linoleic acid<br>( <i>n</i> = 27) |     |                   | Low linoleic acid<br>( <i>n</i> = 27) |     |                   | High milk<br>( <i>n</i> = 22) |     |                   | Control<br>( <i>n</i> = 27) |     |     |
|-------------------------------------|--------------|----------------------------------------|-----|-------------------|---------------------------------------|-----|-------------------|-------------------------------|-----|-------------------|-----------------------------|-----|-----|
|                                     |              | Characteristics *                      | Δ   | ◇                 | Characteristics *                     | Δ   | ◇                 | Characteristics *             | Δ   | ◇                 | Characteristics *           | Δ   | ◇   |
| C-20:5n3 (EPA)                      | 0            | 0.96 (±0.34)                           | a   | a                 | 0.91 (0.79, 1.26)                     | a   | a                 | 0.84 (±0.31)                  | a   | a                 | 0.91 (0.75, 1.37)           | a   | a   |
|                                     |              | 0.90 (0.74, 1.21)                      |     |                   |                                       |     |                   | 0.86 (0.62, 1.03)             |     |                   |                             |     |     |
|                                     | 4            | 1.20 (±0.25)                           | b   | a                 | 1.16 (0.95, 1.36)                     | b   | a                 | 1.16 (±0.38)                  | b   | a                 | 1.32 (0.87, 1.41)           | b   | a   |
|                                     |              | 1.19 (1.06, 1.39)                      |     |                   |                                       |     |                   | 1.13 (1.01, 1.52)             |     |                   |                             |     |     |
|                                     | 8            | 1.31 (±0.35)                           | c   | a                 | 1.37 (1.06, 1.61)                     | c   | a                 | 1.11 (±0.30)                  | b   | a                 | 1.24 (0.99, 1.51)           | b   | a   |
|                                     |              | 1.25 (1.09, 1.46)                      |     |                   |                                       |     |                   | 1.11 (0.95, 1.37)             |     |                   |                             |     |     |
|                                     | 12           | 1.51 (±0.46)                           | d   | a                 | 1.51 (±0.41)                          | c   | a                 | 1.36 (±0.52)                  | c   | a                 | 1.46 (±0.51)                | b   | a   |
| 1.55 (1.34, 1.80)                   |              | 1.42 (1.21, 1.63)                      |     |                   |                                       |     |                   |                               |     |                   |                             |     |     |
| Cfb (%)                             |              | 68.84 (28.20, 85.26)                   |     | a                 | 65.94 (16.93, 81.34)                  |     | a                 | 72.84 (34.36, 107.80)         |     | a                 | 37.17 (15.32, 68.61)        |     | a   |
| C-22:4n6                            | 0            | 3.25 (±0.77)                           | a   | a                 | 3.23 (±0.86)                          | a   | a                 | 2.97 (±0.64)                  | a   | a                 | 2.45 (±0.48)                | a   | b   |
|                                     |              | 3.08 (2.66, 3.68)                      |     |                   | 3.12 (2.55, 3.88)                     |     |                   | 3.05 (2.59, 3.43)             |     |                   |                             |     |     |
|                                     | 4            | 2.71 (2.22, 2.90)                      | b   | a                 | 2.56 (2.29, 3.13)                     | a,b | a                 | 2.87 (2.5, 3.62)              | a   | a                 | 2.32 (±0.45)                | b   | b   |
|                                     |              | 2.27 (2.01, 2.61)                      |     |                   |                                       |     |                   |                               |     |                   |                             |     |     |
|                                     | 8            | 2.34 (2.14, 2.72)                      | c   | a,b               | 2.54 (2.22, 2.73)                     | b   | a,b               | 2.62 (2.25, 3.17)             | a   | a                 | 2.25 (±0.46)                | b   | b   |
|                                     |              | 2.30 (1.95, 2.51)                      |     |                   |                                       |     |                   |                               |     |                   |                             |     |     |
|                                     | 12           | 2.28 (±0.40)                           | c   | a                 | 2.42 (±0.38)                          | b   | a                 | 2.87 (±0.85)                  | a   | b                 | 2.14 (±0.48)                | c   | a   |
| 2.30 (1.94, 2.48)                   |              | 2.47 (2.11, 2.68)                      |     |                   | 2.73 (2.46, 3.26)                     |     |                   |                               |     |                   |                             |     |     |
| Cfb (%)                             |              | -30.21 (-38.99, -14.09)                |     | a                 | -22.85 (-35.85, -11.03)               |     | a,c               | -1.97 (-18.69, 12.07)         |     | b                 | -12.25 (-17.56, -1.50)      |     | b,c |
| C-22:5n6                            | 0            | 0.49 (0.41, 0.62)                      | a   | a                 | 0.43 (0.32, 0.61)                     | a   | a,b               | 0.36 (0.32, 0.42)             | a   | b                 | 0.44 (0.35, 0.53)           | a   | a,b |
|                                     | 4            | 0.33 (0.30, 0.37)                      | b   | a                 | 0.31 (0.25, 0.36)                     | b   | a                 | 0.35 (0.29, 0.38)             | a   | a                 | 0.33 (0.28, 0.41)           | b   | a   |
|                                     | 8            | 0.29 (0.26, 0.34)                      | c   | a,b               | 0.20 (0.22, 0.30)                     | c   | b                 | 0.31 (0.27, 0.41)             | a   | a                 | 0.34 (0.28, 0.39)           | b   | a   |
|                                     | 12           | 0.27 (±0.04)                           | c   | a,b               | 0.26 (±0.06)                          | c   | b                 | 0.32 (±0.11)                  | a   | a                 | 0.31 (±0.08)                | b   | a   |
|                                     |              | 0.27 (0.24, 0.29)                      |     |                   | 0.27 (0.20, 0.29)                     |     |                   | 0.29 (0.25, 0.35)             |     |                   | 0.31 (0.26, 0.36)           |     |     |
| Cfb (%)                             |              | -46.72 (-56.48, -36.62)                |     | a                 | -39.13 (-49.77, -31.25)               |     | a,c               | -14.37 (-26.67, 0.72)         |     | b                 | -31.98 (-46.20, -15.85)     |     | c   |
| C-22:5n3 (DPA)                      | 0            | 3.00 (±0.69)                           | a   | a                 | 2.97 (2.29, 3.44)                     | a,b | a                 | 2.43 (2.01, 2.81)             | a   | b                 | 2.36 (2.22, 2.72)           | a   | b   |
|                                     |              | 3.20 (2.51, 3.44)                      |     |                   |                                       |     |                   |                               |     |                   |                             |     |     |
|                                     | 4            | 2.69 (±0.57)                           | a,b | a                 | 2.63 (2.18, 2.91)                     | a   | a                 | 2.76 (2.39, 3.09)             | a,b | a                 | 2.46 (2.27, 2.60)           | a   | a   |
|                                     |              | 2.53 (2.42, 2.98)                      |     |                   |                                       |     |                   |                               |     |                   |                             |     |     |
|                                     | 8            | 2.61 (±0.36)                           | b   | a                 | 2.61 (±0.32)                          | a   | a                 | 2.72 (±0.75)                  | a   | a                 | 2.49 (±0.33)                | a,b | a   |
|                                     |              | 2.57 (2.39, 2.91)                      |     |                   | 2.56 (2.21, 3.20)                     |     |                   | 2.51 (2.29, 2.64)             |     |                   |                             |     |     |
| 12                                  | 2.81 (±0.39) | a                                      | a,b | 2.88 (2.62, 3.04) | b                                     | a,b | 3.00 (2.77, 3.38) | b                             | a   | 2.65 (2.53, 2.83) | b                           | b   |     |
| Cfb (%)                             |              | -2.30 (±22.98)                         |     | a                 | 1.81 (±23.42)                         |     | a                 | 35.82 (±43.72)                |     | b                 | 11.27 (±14.86)              |     | a   |

Table S3. Continued.

| Erythrocyte fatty acids<br>(% FAME) | Week    | High linoleic acid<br>(n = 27)        |   |     | Low linoleic acid<br>(n = 27)         |     |     | High milk<br>(n = 22)                 |   |   | Control<br>(n = 27)                   |     |     |
|-------------------------------------|---------|---------------------------------------|---|-----|---------------------------------------|-----|-----|---------------------------------------|---|---|---------------------------------------|-----|-----|
|                                     |         | Characteristics *                     | Δ | ◇   | Characteristics *                     | Δ   | ◇   | Characteristics *                     | Δ | ◇ | Characteristics *                     | Δ   | ◇   |
| C-22:6n3 (DHA)                      | 0       | 5.75 (±1.41)<br>5.73 (4.66, 6.54)     | a | a   | 5.20 (4.40, 5.98)                     | a   | a,c | 4.18 (3.06, 4.95)                     | a | b | 4.85 (±0.86)<br>4.76 (4.27, 5.47)     | a   | b,c |
|                                     | 4       | 4.53 (±1.01)                          | b | a   | 4.44 (±1.13)<br>4.32 (3.67, 4.96)     | b   | a   | 4.39 (±1.18)<br>4.18 (3.65, 5.33)     | a | a | 4.05 (±0.94)                          | b   | a   |
|                                     | 8       | 3.93 (±0.69)<br>4.06 (3.46, 4.23)     | c | a   | 3.72 (3.08, 4.40)                     | c   | a   | 3.53 (3.19, 4.35)                     | a | a | 4.04 (±0.92)<br>4.04 (3.35, 4.61)     | b   | a   |
|                                     | 12      | 3.87 (±0.66)                          | c | a   | 3.67 (±0.70)<br>3.67 (3.15, 4.21)     | c   | a   | 3.79 (±1.18)<br>3.91 (3.17, 4.67)     | a | a | 3.91 (±0.79)                          | b   | a   |
|                                     | Cfb (%) | -33.96 (-41.68, -20.05)               |   | a   | -35.47 (-39.61, -17.42)               |     | a   | -5.97 (-19.99, 14.69)                 |   | b | -18.66 (-29.33, -11.47)               |     | b   |
|                                     |         |                                       |   |     |                                       |     |     |                                       |   |   |                                       |     |     |
| SFA                                 | 0       | 33.63 (31.96, 34.58)                  | a | a   | 33.89 (31.87, 36.02)                  | a   | a   | 36.28 (34.31, 38.94)                  | a | b | 37.20 (36.45, 37.65)                  | a,b | b   |
|                                     | 4       | 32.76 (31.78, 33.94)                  | a | a   | 34.00 (32.25, 34.89)                  | a   | a   | 36.15 (33.74, 37.77)                  | a | b | 36.37 (35.21, 37.24)                  | a   | b   |
|                                     | 8       | 33.88 (33.29, 34.43)                  | a | a   | 34.15 (33.44, 34.59)                  | a   | a   | 39.30 (36.30, 40.91)                  | a | b | 38.09 (37.24, 39.28)                  | b   | b   |
|                                     | 12      | 33.87 (33.07, 35.32)                  | a | a   | 33.77 (32.70, 34.67)                  | a   | a   | 37.36 (33.48, 39.26)                  | a | b | 37.78 (37.16, 38.63)                  | b   | b   |
|                                     | Cfb (%) | 2.81 (-5.27, 9.70)                    |   | a   | -0.38 (-7.79, 6.97)                   |     | a   | 0.00 (-11.49, 8.98)                   |   | a | 1.77 (-0.82, 5.66)                    |     | a   |
| MUFA                                | 0       | 15.77 (±1.00)                         | a | a   | 15.90 (±1.21)                         | a   | a   | 18.13 (±1.35)<br>18.11 (17.18, 19.34) | a | b | 17.02 (±1.32)                         | a   | c   |
|                                     | 4       | 16.26 (±0.92)                         | b | a   | 16.61 (±1.15)                         | b   | a   | 17.02 (±1.32)<br>17.07 (16.34, 17.83) | b | a | 16.96 (±1.36)                         | a   | a   |
|                                     | 8       | 16.89 (±0.79)                         | c | a   | 17.42 (±1.25)                         | c   | a   | 17.14 (±1.23)<br>17.14 (16.31, 18.15) | b | a | 17.09 (±1.47)                         | a   | a   |
|                                     | 12      | 16.87 (±0.80)<br>16.60 (16.28, 17.49) | c | a   | 17.55 (±1.14)<br>17.77 (16.61, 18.33) | c   | a,b | 18.26 (17.41, 19.17)                  | a | b | 17.40 (±1.06)<br>17.37 (16.65, 18.23) | a   | a,b |
|                                     | Cfb (%) | 7.30 (±7.55)                          |   | a   | 10.55 (±5.25)                         |     | a   | -0.02 (±7.75)                         |   | b | 2.57 (±7.14)                          |     | b   |
|                                     |         |                                       |   |     |                                       |     |     |                                       |   |   |                                       |     |     |
| C-18:1c9/C-18:0                     | 0       | 0.96 (0.92, 1.03)<br>1.22 (±0.17)     | a | a   | 1.01 (0.88, 1.07)<br>1.21 (±0.18)     | a   | a   | 1.34 (1.25, 1.43)<br>1.38 (±0.18)     | a | b | 1.11 (0.99, 1.24)<br>1.29 (±0.14)     | a   | c   |
|                                     | 4       | 1.22 (1.15, 1.35)                     | b | a   | 1.20 (1.07, 1.35)                     | b   | a   | 1.40 (1.28, 1.50)                     | a | b | 1.27 (1.19, 1.39)                     | b   | a,b |
|                                     | 8       | 1.35 (1.31, 1.39)                     | b | a   | 1.36 (1.27, 1.46)                     | c   | a   | 1.14 (1.07, 1.24)                     | b | b | 1.24 (1.13, 1.33)                     | a,b | b   |
|                                     | 12      | 1.26 (1.18, 1.41)                     | b | a   | 1.38 (1.24, 1.47)                     | b,c | a   | 1.34 (1.25, 1.49)                     | a | a | 1.37 (1.20, 1.48)                     | b   | a   |
|                                     | Cfb (%) | 35.69 (±25.96)                        |   | a,c | 41.36 (±20.92)                        |     | a   | 1.66 (±21.63)                         |   | b | 25.07 (±27.69)                        |     | c   |



Table S3. Continued.

| Erythrocyte fatty acids<br>(% FAME) | Week | High linoleic acid<br>( <i>n</i> = 27) |     |     | Low linoleic acid<br>( <i>n</i> = 27) |   |     | High milk<br>( <i>n</i> = 22) |     |     | Control<br>( <i>n</i> = 27) |     |     |
|-------------------------------------|------|----------------------------------------|-----|-----|---------------------------------------|---|-----|-------------------------------|-----|-----|-----------------------------|-----|-----|
|                                     |      | Characteristics *                      | Δ   | ◇   | Characteristics *                     | Δ | ◇   | Characteristics *             | Δ   | ◇   | Characteristics *           | Δ   | ◇   |
| PUFA                                | 0    | 41.34 (±3.23)                          | a   | a   | 40.90 (±3.55)                         | a | a   | 39.55 (±3.80)                 | a   | a,b | 38.65 (±2.00)               | a   | b   |
|                                     |      | 41.02 (38.74, 43.55)                   |     |     |                                       |   |     | 39.28 (36.79, 41.83)          |     |     | 38.43 (37.49, 39.97)        |     |     |
|                                     | 4    | 39.57 (38.06, 41.29)                   | a   | a   | 39.02 (±2.63)                         | b | a,b | 40.93 (38.01, 42.68)          | a   | a   | 37.77 (36.59, 38.56)        | b   | b   |
|                                     |      |                                        |     |     | 38.72 (37.26, 40.71)                  |   |     |                               |     |     |                             |     |     |
|                                     | 8    | 39.14 (±1.44)                          | a   | a   | 38.49 (±1.41)                         | b | a,b | 39.27 (±4.47)                 | a   | a   | 37.39 (±1.60)               | b,c | b   |
|                                     |      | 39.37 (38.14, 40.27)                   |     |     |                                       |   |     | 38.54 (37.50, 41.78)          |     |     | 37.13 (36.55, 38.09)        |     |     |
| Cfb (%)                             | 12   | 39.45 (38.59, 40.23)                   | a   | a   | 38.93 (±1.04)                         | b | a   | 40.32 (36.48, 42.82)          | a   | a   | 36.91 (35.95, 37.29)        | c   | b   |
|                                     |      |                                        |     |     | 38.75 (38.17, 39.70)                  |   |     |                               |     |     |                             |     |     |
|                                     |      | -5.77 (-10.18, 3.04)                   |     | a   | -4.00 (-9.84, 0.89)                   |   | a,b | 2.80 (-4.24, 12.37)           |     | b   | -4.72 (-8.23, -1.93)        |     | a   |
| <i>n</i> -6 PUFA                    | 0    | 31.30 (±1.82)                          | a   | a,b | 31.06 (±2.23)                         | a | a,b | 32.01 (±3.27)                 | a   | a   | 30.03 (±1.80)               | a   | b   |
|                                     |      |                                        |     |     |                                       |   |     | 31.61 (29.97, 34.06)          |     |     | 30.44 (29.01, 31.24)        |     |     |
|                                     | 4    | 30.63 (±1.55)                          | a,b | a,b | 29.89 (±1.69)                         | b | a,c | 31.50 (29.91, 33.21)          | a   | b   | 29.23 (28.11, 30.15)        | a,c | c   |
|                                     |      | 30.47 (29.84, 31.22)                   |     |     | 29.97 (28.39, 31.41)                  |   |     |                               |     |     |                             |     |     |
|                                     | 8    | 30.38 (±1.26)                          | a,b | a   | 29.68 (±1.33)                         | b | a,b | 30.74 (±3.14)                 | a   | a   | 28.76 (±1.83)               | b,c | b   |
|                                     |      |                                        |     |     |                                       |   |     | 30.33 (29.44, 32.85)          |     |     | 28.73 (27.45, 29.69)        |     |     |
| Cfb (%)                             | 12   | 30.03 (±1.25)                          | b   | a   | 29.84 (±1.27)                         | b | a   | 30.83 (29.18, 33.44)          | a   | a   | 28.06 (26.89, 29.05)        | b   | b   |
|                                     |      | 30.51 (29.18, 30.89)                   |     |     | 29.47 (28.75, 30.86)                  |   |     |                               |     |     |                             |     |     |
|                                     |      | -4.06 (-7.91, 0.17)                    |     | a,b | -3.57 (-6.14, -0.77)                  |   | a,b | -0.23 (-8.36, 5.23)           |     | a   | -7.18 (-9.00, -4.71)        |     | b   |
| <i>n</i> -3 PUFA                    | 0    | 9.57 (8.59, 11.45)                     | a   | a   | 9.47 (7.86, 10.50)                    | a | a,c | 7.54 (±1.87)                  | a   | b   | 8.61 (±1.38)                | a   | b,c |
|                                     |      |                                        |     |     |                                       |   |     | 7.23 (5.95, 9.10)             |     |     | 8.60 (7.49, 9.49)           |     |     |
|                                     | 4    | 9.12 (±1.49)                           | a   | a   | 9.03 (±1.85)                          | a | a   | 9.20 (±1.62)                  | b   | a   | 8.34 (±1.53)                | a   | a   |
|                                     |      | 8.83 (8.21, 9.70)                      |     |     | 8.84 (7.83, 9.60)                     |   |     |                               |     |     |                             |     |     |
|                                     | 8    | 8.77 (8.13, 9.03)                      | a   | a   | 8.56 (7.99, 9.71)                     | a | a   | 8.50 (±2.06)                  | a,b | a   | 8.59 (±1.56)                | a   | a   |
|                                     |      |                                        |     |     |                                       |   |     | 7.94 (7.09, 9.50)             |     |     | 8.25 (7.65, 9.81)           |     |     |
| Cfb (%)                             | 12   | 9.15 (±0.99)                           | a   | a   | 8.98 (±1.38)                          | a | a   | 9.18 (±2.48)                  | b   | a   | 8.83 (±1.41)                | a   | a   |
|                                     |      | 9.14 (8.77, 9.60)                      |     |     | 9.34 (8.22, 9.75)                     |   |     |                               |     |     |                             |     |     |
|                                     |      | -8.41 (-18.86, 5.69)                   |     | a   | -4.05 (-17.48, 6.99)                  |   | a   | 15.60 (2.07, 48.10)           |     | b   | 3.16 (-7.52, 13.55)         |     | a,b |
| <i>n</i> -6/ <i>n</i> -3            | 0    | 3.24 (2.80, 3.54)                      | a   | a   | 3.31 (2.93, 3.77)                     | a | a   | 4.51 (±1.25)                  | a   | b   | 3.58 (±0.68)                | a   | a   |
|                                     |      |                                        |     |     |                                       |   |     | 4.35 (3.56, 5.41)             |     |     | 3.49 (3.05, 3.89)           |     |     |
|                                     | 4    | 3.40 (±0.49)                           | a,b | a   | 3.41 (±0.69)                          | a | a   | 3.54 (±0.70)                  | b   | a   | 3.56 (±0.72)                | a   | a   |
|                                     |      | 3.41 (3.10, 3.70)                      |     |     | 3.40 (2.85, 3.71)                     |   |     |                               |     |     |                             |     |     |
|                                     | 8    | 3.50 (±0.36)                           | b   | a   | 3.47 (±0.69)                          | a | a   | 3.75 (±0.73)                  | b   | a   | 3.46 (±0.79)                | a,b | a   |
|                                     |      | 3.54 (3.35, 3.69)                      |     |     | 3.37 (2.99, 3.70)                     |   |     |                               |     |     |                             |     |     |
| Cfb (%)                             | 12   | 3.26 (3.11, 3.42)                      | a   | a   | 3.11 (2.94, 3.70)                     | a | a   | 3.47 (±0.75)                  | b   | a   | 3.25 (±0.73)                | b   | a   |
|                                     |      |                                        |     |     |                                       |   |     | 3.56 (2.93, 4.00)             |     |     | 3.09 (2.82, 3.60)           |     |     |
|                                     |      | 4.55 (±20.62)                          |     | a   | 4.10 (±18.09)                         |   | a   | -20.64 (±14.51)               |     | b   | -8.67 (±13.62)              |     | c   |

Table S3. Continued.

| Erythrocyte fatty acids<br>(% FAME) | Week    | High linoleic acid<br>(n = 27) |     |     | Low linoleic acid<br>(n = 27) |     |     | High milk<br>(n = 22)   |     |     | Control<br>(n = 27)     |   |     |
|-------------------------------------|---------|--------------------------------|-----|-----|-------------------------------|-----|-----|-------------------------|-----|-----|-------------------------|---|-----|
|                                     |         | Characteristics *              | Δ   | ◇   | Characteristics *             | Δ   | ◇   | Characteristics *       | Δ   | ◇   | Characteristics *       | Δ | ◇   |
| TFA                                 | 0       | 0.36 (0.31, 0.42)              | a   | a   | 0.33 (0.27, 0.42)             | a   | a   | 0.50 (0.44, 0.66)       | a,c | b   | 0.48 (0.43, 0.65)       | a | b   |
|                                     | 4       | 0.29 (0.25, 0.33)              | b   | a   | 0.26 (0.22, 0.36)             | a   | a   | 0.53 (0.43, 0.58)       | a   | b   | 0.42 (0.39, 0.50)       | a | b   |
|                                     | 8       | 0.27 (0.24, 0.29)              | b   | a   | 0.27 (0.24, 0.32)             | a   | a   | 0.61 (0.49, 0.68)       | b,c | b   | 0.49 (0.41, 0.69)       | a | b   |
|                                     | 12      | 0.28 (0.26, 0.53)              | b   | a   | 0.30 (0.23, 0.83)             | a   | a   | 0.68 (0.62, 0.78)       | b   | b   | 0.44 (0.38, 0.70)       | a | a,b |
|                                     | Cfb (%) | -14.65 (-27.85, 2.93)          |     | a   | -3.37 (-17.04, 133.81)        |     | a,b | 29.58 (12.71, 51.89)    |     | b   | -0.23 (-26.45, 34.81)   |   | a   |
| EPA/ALA<br>(n + (Control) = 26)     | 0       | 6.04 (4.59, 8.45)              | a   | a   | 5.36 (4.58, 7.03)             | a   | a   | 4.60 (4.23, 6.28)       | a   | a   | 5.59 (4.20, 6.90)       | a | a   |
|                                     | 4       | 2.32 (1.65, 3.17)              | b   | a   | 2.17 (1.58, 2.98)             | b   | a   | 1.98 (1.65, 2.59)       | b   | a   | 2.01 (1.77, 2.53)       | b | a   |
|                                     | 8       | 2.15 (1.54, 2.65)              | b   | a   | 1.84 (1.45, 2.30)             | b   | a   | 1.84 (1.35, 2.38)       | b   | a   | 1.97 (1.58, 2.98)       | b | a   |
|                                     | 12      | 2.05 (1.51, 2.49)              | b   | a   | 1.93 (1.48, 2.81)             | b   | a   | 2.05 (1.47, 2.90)       | b   | a   | 1.99 (1.67, 2.65)       | b | a   |
|                                     | Cfb (%) | -68.97 (-77.97, -53.31)        |     | a   | -66.94 (-71.34, -42.33)       |     | a   | -61.15 (-71.47, -50.76) |     | a   | -62.69 (-71.87, -54.95) |   | a   |
| DPA/ALA<br>(n + (Control) = 26)     | 0       | 18.92 (16.00, 23.70)           | a   | a   | 16.50 (12.28, 21.07)          | a   | a,b | 16.07 (13.98, 19.27)    | a   | a,b | 14.79 (10.55, 17.35)    | a | b   |
|                                     | 4       | 4.63 (3.62, 6.35)              | b   | a   | 4.65 (3.51, 6.64)             | b   | a   | 4.54 (3.70, 6.75)       | b   | a   | 4.12 (3.35, 5.46)       | b | a   |
|                                     | 8       | 3.85 (3.35, 5.17)              | b,c | a   | 3.33 (2.53, 5.10)             | c   | a   | 4.11 (3.47, 5.68)       | b   | a   | 3.65 (3.15, 5.32)       | b | a   |
|                                     | 12      | 3.50 (2.64, 4.84)              | c   | a   | 3.77 (2.69, 5.04)             | b,c | a   | 4.45 (3.17, 6.77)       | b   | a   | 3.86 (3.22, 4.59)       | b | a   |
|                                     | Cfb (%) | -79.35 (-87.18, -73.49)        |     | a   | -77.89 (-85.11, -52.67)       |     | a,b | -73.33 (-79.64, -47.07) |     | b   | -69.49 (-77.51, -61.96) |   | b   |
| DHA/ALA<br>(n + (Control) = 26)     | 0       | 37.77 (29.63, 52.46)           | a   | a   | 27.46 (20.07, 41.56)          | a   | a,b | 23.91 (22.08, 33.54)    | a   | b   | 28.95 (19.78, 36.77)    | a | b   |
|                                     | 4       | 7.32 (5.78, 12.47)             | b   | a   | 7.64 (5.64, 10.35)            | b   | a   | 7.66 (5.21, 9.96)       | b   | a   | 7.26 (5.06, 8.48)       | b | a   |
|                                     | 8       | 6.03 (4.82, 7.55)              | c   | a   | 5.01 (3.74, 7.77)             | c   | a   | 6.19 (3.77, 9.75)       | b   | a   | 6.06 (4.78, 8.40)       | b | a   |
|                                     | 12      | 4.94 (3.88, 7.38)              | c   | a   | 5.37 (3.36, 7.12)             | c   | a   | 5.37 (4.08, 7.17)       | b   | a   | 5.33 (4.64, 7.14)       | b | a   |
|                                     | Cfb (%) | -86.19 (-90.95, -81.25)        |     | a   | -85.59 (-90.36, -64.30)       |     | a,b | -81.50 (-84.64, -61.92) |     | b   | -77.90 (-84.20, -71.06) |   | b   |
| ARA/LA                              | 0       | 1.54 (1.37, 1.86)              | a   | a   | 1.50 (±0.25)                  | a   | a   | 1.29 (±0.19)            | a   | b   | 1.35 (1.23, 1.41)       | a | b   |
|                                     |         |                                |     |     | 1.52 (1.31, 1.72)             |     |     | 1.30 (1.18, 1.44)       |     |     |                         |   |     |
|                                     | 4       | 1.14 (1.05, 1.40)              | b   | a,b | 1.28 (±0.22)                  | b   | a   | 1.27 (±0.22)            | a   | a   | 1.09 (1.04, 1.21)       | b | b   |
|                                     |         |                                |     |     | 1.30 (1.13, 1.38)             |     |     | 1.27 (1.10, 1.42)       |     |     |                         |   |     |
|                                     | 8       | 1.04 (0.91, 1.19)              | c   | a   | 1.10 (±0.15)                  | c   | a,b | 1.24 (±0.22)            | a,b | b   | 1.09 (1.01, 1.20)       | b | a,b |
|                                     |         |                                |     |     | 1.11 (0.97, 1.19)             |     |     | 1.24 (1.07, 1.34)       |     |     |                         |   |     |
|                                     | 12      | 1.07 (±0.20)                   | c   | a   | 1.10 (±0.15)                  | c   | a   | 1.16 (±0.20)            | b   | a   | 1.04 (±0.17)            | c | a   |
|                                     |         | 1.06 (0.89, 1.16)              |     |     |                               |     |     |                         |     |     | 1.07 (0.93, 1.14)       |   |     |
|                                     | Cfb (%) | -31.11 (-39.67, -25.41)        |     | a   | -26.74 (-35.02, -18.09)       |     | a,c | -11.87 (-16.17, -2.90)  |     | b   | -20.07 (-25.74, -15.07) |   | c   |

Table S3. Continued.

| Erythrocyte fatty acids<br>(% FAME) | Week    | High linoleic acid<br>( <i>n</i> = 27) |     |   | Low linoleic acid<br>( <i>n</i> = 27) |   |   | High milk<br>( <i>n</i> = 22)     |   |   | Control<br>( <i>n</i> = 27)       |   |     |
|-------------------------------------|---------|----------------------------------------|-----|---|---------------------------------------|---|---|-----------------------------------|---|---|-----------------------------------|---|-----|
|                                     |         | Characteristics *                      | Δ   | ◇ | Characteristics *                     | Δ | ◇ | Characteristics *                 | Δ | ◇ | Characteristics *                 | Δ | ◇   |
| <i>n</i> -3 index                   | 0       | 6.71 (±1.63)<br>6.63 (5.51, 7.53)      | a   | a | 6.16 (5.14, 7.02)                     | a | a | 4.84 (3.56, 5.96)                 | a | b | 5.92 (±1.15)<br>5.85 (4.98, 6.89) | a | a,b |
|                                     | 4       | 5.74 (±1.13)                           | b   | a | 5.63 (±1.31)<br>5.42 (4.73, 6.40)     | b | a | 5.56 (±1.38)<br>5.25 (4.68, 6.65) | a | a | 5.30 (±1.27)                      | b | a   |
|                                     | 8       | 5.25 (±0.74)<br>5.17 (4.76, 5.65)      | c   | a | 5.08 (4.41, 5.89)                     | b | a | 4.63 (3.91, 5.43)                 | a | a | 5.38 (±1.32)<br>5.11 (4.64, 6.32) | b | a   |
|                                     | 12      | 5.39 (±0.81)                           | b,c | a | 5.18 (±0.94)<br>5.25 (4.47, 5.93)     | b | a | 5.15 (±1.48)<br>4.98 (4.32, 6.17) | a | a | 5.37 (±1.16)                      | b | a   |
|                                     | Cfb (%) | -18.78 (-28.56, -11.48)                |     | a | -21.39 (-28.81, -6.68)                |   | a | 0.69 (-9.13, 28.30)               |   | b | -9.61 (-19.36, -2.25)             |   | a,b |

\* Variables expressed as mean (±SD) and/or as median (25<sup>th</sup>, 75<sup>th</sup> percentile) depending on the statistical tests that were performed; ◇ groups without a common letter are significantly different, *p* < 0.05; Δ points in time without a common letter are significantly different, *p* < 0.05; † number of data sets used to calculate shown data if differing from *n*. Abbreviations: ALA, α-linolenic acid; ARA, arachidonic acid; Cfb (%), percentage change from baseline; DHA, docosahexaenoic acid; DPA, docosapentaenoic acid; EPA, eicosapentaenoic acid; ETA, eicosatetraenoic acid; FAME, fatty acid methyl ester; LA, linoleic acid; MUFA, monounsaturated fatty acids; PUFA, polyunsaturated fatty acids; SFA, saturated fatty acids; TFA, trans-fatty acids

**Table S4.** Comparison of percentage change from baseline without diet group subdivision but with split by sex differences, EPA baseline status and LA change throughout the study.

| Subgroups                      | Whole study collective     |        |
|--------------------------------|----------------------------|--------|
|                                | Change from baseline (%) * | Δ      |
| C-20:5n3 (EPA)                 |                            |        |
| (n † = 68, 35, 54, 49, 52, 51) |                            |        |
| Women                          | 39.39 (12.85, 79.04)       | 0.043  |
| Men                            | 69.00 (34.96, 94.35)       |        |
| EPA (<0.9) <sup>Baseline</sup> | 79.28 (45.72, 111.29)      | <0.001 |
| EPA (≥0.9) <sup>Baseline</sup> | 28.96 (8.61, 58.01)        |        |
| LA (<1.5) <sup>Change</sup>    | 58.02 (26.25, 98.35)       |        |
| LA (≥1.5) <sup>Change</sup>    | 39.40 (16.93, 81.19)       |        |
| n-3 index                      |                            |        |
| (n † = 68, 35, 54, 49, 52, 51) |                            |        |
| Women                          | -13.33 (-27.62, 0.32)      | n.s.   |
| Men                            | -10.41 (-18.16, -2.25)     |        |
| EPA (<0.9) <sup>Baseline</sup> | -4.90 (-19.79, 8.21)       | <0.001 |
| EPA (≥0.9) <sup>Baseline</sup> | -17.59 (-26.72, -10.40)    |        |
| LA (<1.5) <sup>Change</sup>    | -6.53 (-14.16, 7.86)       |        |
| LA (≥1.5) <sup>Change</sup>    | -21.50 (-29.36, -10.41)    |        |

\* Variables expressed as mean (±SD) and/or as median (25<sup>th</sup>, 75<sup>th</sup> percentile) depending on the statistical test that was performed; † Number of data sets used to calculate shown data per subgroup; Δ Comparison of subgroups; <sup>Baseline</sup> Subgroup built by using baseline EPA status (<0.9 % FAME vs. ≥0.9 % FAME); <sup>Change</sup> Subgroup built by using total LA change (% FAME) that was observed throughout the study (<1.5 % FAME vs. ≥1.5 % FAME). Abbreviations: EPA, eicosapentaenoic acid; LA, linoleic acid
